# Supplementary material for: Decision Making and Executive Function in Male Adolescents with Early-Onset or Adolescence-Onset Conduct Disorder and Control Subjects
Source: PubMed Central journal article supplement (PMC2733860; doi:10.1016/j.biopsych.2009.02.024), 2009-07-15
Supplement: mmc1.pdf [file mmc1.pdf]

**Supplementary Table 1:** The ten trial types included in the Risky Choice Task, including the balanced ‘framing’ trials in which the expected value of each wheel is the same, but one wheel has a certain outcome (either +40 or -40) and one has an uncertain outcome (a .5 chance of either winning or losing 80, and a .5 chance of receiving 0 points). Pr(Gain) indicates the probability of a gain.

| Experimental gamble |      |      | Control gamble |      |      | Difference in expected value<br>( $\Delta$ EV) between gambles |
|---------------------|------|------|----------------|------|------|----------------------------------------------------------------|
| Pr(Gain)            | Gain | Loss | Pr(Gain)       | Gain | Loss |                                                                |
| 0.25                | 20   | -80  | 0.50           | 10   | -10  | -55                                                            |
| 0.25                | 80   | -80  | 0.50           | 10   | -10  | -40                                                            |
| 0.25                | 20   | -20  | 0.50           | 10   | -10  | -10                                                            |
| 0.75                | 20   | -80  | 0.50           | 10   | -10  | -5                                                             |
| 0.25                | 80   | -20  | 0.50           | 10   | -10  | +5                                                             |
| 0.75                | 20   | -20  | 0.50           | 10   | -10  | +10                                                            |
| 0.75                | 80   | -80  | 0.50           | 10   | -10  | +40                                                            |
| 0.75                | 80   | -20  | 0.50           | 10   | -10  | +55                                                            |
| 0.50                | 0    | -80  | 0.00           | 0    | -40  | 0 (- frame)                                                    |
| 0.50                | 80   | 0    | 1.00           | 40   | 0    | 0 (+ frame)                                                    |
