# Supplementary material for: Decision Making and Executive Function in Male Adolescents with Early-Onset or Adolescence-Onset Conduct Disorder and Control Subjects
Source: PubMed Central journal article supplement (PMC2733860; doi:10.1016/j.biopsych.2009.02.024), 2009-07-15
Supplement: mmc4.pdf [file mmc4.pdf]

**Supplementary Table 2:** Raw mean scores on the Wisconsin Card Sorting Test (WCST) for control, adolescence-onset CD and early-onset CD groups and accompanying ANOVA results, prior to correction for between-group differences in IQ.

| Measures                                 | CON (n = 83) |      | AO-CD (n = 32) |      | EO-CD (n = 36) |      | P     | Post-hoc       |
|------------------------------------------|--------------|------|----------------|------|----------------|------|-------|----------------|
|                                          | Mean         | SD   | Mean           | SD   | Mean           | SD   |       |                |
| <b>Wisconsin Card Sorting Test</b>       |              |      |                |      |                |      |       |                |
| <b>Categories completed</b>              | 6.0          | 0.0  | 6.0            | 0.0  | 5.9            | 0.5  | <.05  | No differences |
| <b>Trials administered</b>               | 83.6         | 12.0 | 86.8           | 12.8 | 90.6           | 16.2 | <.05  | CON < EO-CD    |
| <b>Perseverative errors</b>              | 7.2          | 2.7  | 8.4            | 4.0  | 9.7            | 4.9  | <.005 | CON < EO-CD    |
| <b>Non-perseverative errors</b>          | 7.5          | 4.7  | 7.4            | 3.9  | 9.4            | 5.5  | .16   |                |
| <b>Trials to 1<sup>st</sup> category</b> | 12.4         | 4.1  | 11.7           | 2.3  | 12.4           | 4.2  | .54   |                |
| <b>Failure to maintain set</b>           | 0.4          | 0.7  | 0.5            | 0.7  | 0.4            | 0.6  | .84   |                |

Note that WCST data were unavailable for one CON, two AO-CD, and two EO-CD participants.

Key: CON, control; AO-CD, adolescence-onset Conduct Disorder, EO-CD, early-onset Conduct Disorder.
